# Supplementary material for: Probiotics, a promising therapy to reduce the recurrence of bacterial vaginosis in women? a systematic review and meta-analysis of randomized controlled trials
Source: PubMed Central journal article supplement (PMC9530327; doi:10.3389/fnut.2022.938838), 2022-09-20
Supplement: Data_Sheet_2.pdf [file Data_Sheet_2.pdf]

Intention-to-treat

| <u>Unique ID</u> | <u>StudyID</u>           | <u>D1</u> | <u>D2</u> | <u>D3</u> | <u>D4</u> | <u>D5</u> | <u>Overall</u> |                                               |
|------------------|--------------------------|-----------|-----------|-----------|-----------|-----------|----------------|-----------------------------------------------|
| 1                | Zhang Y. et al.          |           |           |           |           |           |                | Low risk                                      |
| 2                | Vujic G. et al.          |           |           |           |           |           |                | Some concerns                                 |
| 3                | Reznichenko H. et al.    |           |           |           |           |           |                | High risk                                     |
| 4                | Ya W. et al.             |           |           |           |           |           |                |                                               |
| 5                | Cohen C.R. et al.        |           |           |           |           |           |                | D1 Randomisation process                      |
| 6                | Bohbot J.M. et al.       |           |           |           |           |           |                | D2 Deviations from the intended interventions |
| 7                | Bradshaw C.S. et al.     |           |           |           |           |           |                | D3 Missing outcome data                       |
| 8                | Marcone V. et al. (2010) |           |           |           |           |           |                | D4 Measurement of the outcome                 |
| 9                | Marcone V. et al. (2008) |           |           |           |           |           |                | D5 Selection of the reported result           |
| 10               | Larsson P.G. et al.      |           |           |           |           |           |                |                                               |
